# Supplementary material
Source: publisher site journal article supplement (https://www.kjim.org/upload/media/kjim-2021-021-suppl6.pdf)
Supplement: Supplementary file 1 [file kjim-2021-021-suppl6.pdf]

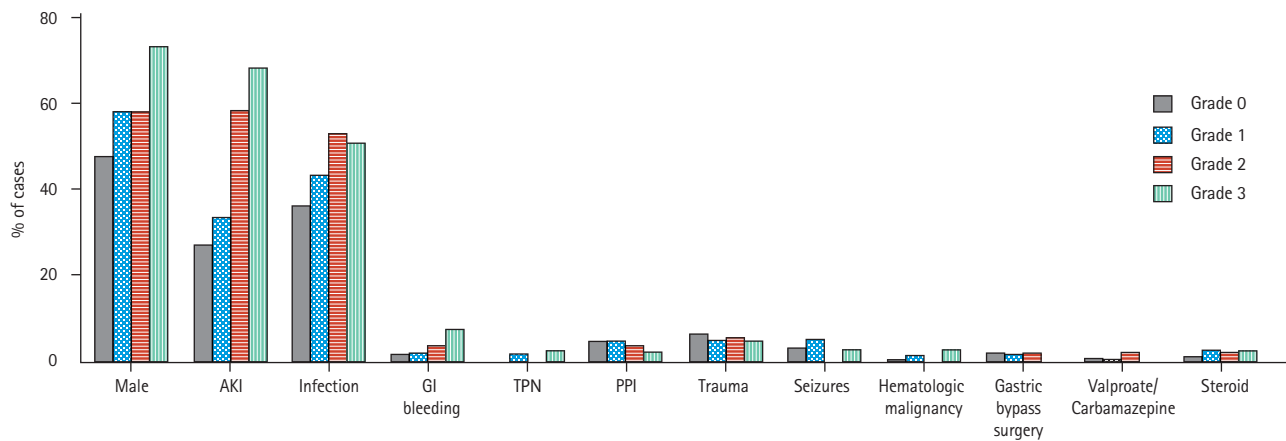

**Supplementary Figure 2.** Potential factors associated with hyperammonemia in the different ammonia grades (n = 972). AKI, acute kidney injury; GI, gastrointestinal; TPN, total parenteral nutrition; PPI, proton pump inhibitor.
